# Supplementary material
Source: PubMed Central journal article supplement (PMC7932045)
Supplement: NIHMS1669293-supplement-1.pdf [file NIHMS1669293-supplement-1.pdf]

**Supplemental Material for:**

**Meteoritic Evidence for a Ceres-sized Water-rich Carbonaceous Chondrite Parent Asteroid**

V. E. Hamilton, C. A. Goodrich, A. H. Treiman, H. C. Connolly, Jr., M. E. Zolensky, and M. H. Shaddad

Supplementary Table 1. Average compositions of minerals in AhS 202 from EMP analyses by wt% oxide and ion calculation

|                                  | <i>Amphibole</i>              |         | <i>Serpentine 1</i> |         | <i>Serpentine 2</i> |         | <i>Clinocllore</i> |          | <i>Magnetite*</i> |         | <i>Diopside</i>  |         | <i>Olivine</i>   |          | <i>Phosphate**</i> |
|----------------------------------|-------------------------------|---------|---------------------|---------|---------------------|---------|--------------------|----------|-------------------|---------|------------------|---------|------------------|----------|--------------------|
|                                  | avg (24)                      | std dev | avg (11)            | std dev | avg (12)            | std dev | avg (22)           | std dev  | avg (47)          | std dev | avg (4)          | std dev | avg (37)         | std dev  | (1)                |
| SiO2                             | 57.5                          | 0.6     | 40.8                | 1.4     | 37.2                | 1.4     | 35.3               | 1.1      | 0.15              | 0.17    | 54.3             | 0.8     | 37.3             | 0.5      | 3.1                |
| TiO2                             | 0.03                          | 0.03    | bdl                 |         | bdl                 |         | bdl                |          | 0.45              | 0.07    | bdl              |         | bdl              |          | 0.12               |
| Al2O3                            | 0.32                          | 0.13    | 2.94                | 0.45    | 3.11                | 0.33    | 10.8               | 0.6      | 0.02              | 0.01    | 0.26             | 0.18    | bdl              |          | 0.08               |
| Cr2O3                            | 0.05                          | 0.02    | 0.38                | 0.26    | 0.35                | 0.07    | 0.75               | 0.26     | 0.67              | 0.71    | 0.23             | 0.08    | 0.03             | 0.01     | 1.30               |
| V2O3                             | na                            |         | na                  |         | na                  |         | na                 |          | bdl               |         | na               |         | na               |          | na                 |
| FeO                              | 4.2                           | 0.3     | 8.0                 | 0.7     | 6.4                 | 0.5     | 7.3                | 0.4      | 30.1              | 0.5     | 3.9              | 0.2     | 28.6             | 0.3      | 14.0               |
| Fe2O3                            |                               |         |                     |         |                     |         |                    |          | 66.9              | 1.1     |                  |         |                  |          |                    |
| NiO                              | 0.06                          | 0.04    | 0.11                | 0.05    | 0.10                | 0.02    | 0.12               | 0.03     | 0.16              | 0.06    | 0.04             | 0.02    | 0.12             | 0.02     | 0.11               |
| MnO                              | 0.18                          | 0.04    | 0.11                | 0.03    | 0.07                | 0.02    | 0.06               | 0.02     | 0.11              | 0.03    | 0.20             | 0.01    | 1.33             | 0.09     | 0.03               |
| MgO                              | 22.5                          | 0.4     | 33.4                | 1.7     | 30.3                | 1.4     | 31.9               | 0.8      | 0.42              | 0.24    | 17.5             | 0.7     | 33.8             | 0.5      | 0.43               |
| CaO                              | 12.5                          | 0.6     | 0.09                | 0.07    | 0.16                | 0.14    | 0.20               | 0.08     | 0.15              | 0.21    | 23.0             | 1.1     | 0.05             | 0.10     | 42.3               |
| Na2O                             | 0.80                          | 0.34    | 0.17                | 0.13    | 0.35                | 0.18    | 0.10               | 0.06     | na                |         | 0.14             | 0.03    | bdl              |          | bdl                |
| K2O                              | bdl                           |         | bdl                 |         | bdl                 |         | 0.17               | 0.14     | na                |         | bdl              |         | na               |          | bdl                |
| F                                | bdl                           |         | bdl                 |         | bdl                 |         | bdl                |          | na                |         | na               |         | na               |          | bdl                |
| Cl                               | bdl                           |         | 0.03                | 0.01    | 0.05                | 0.01    | bdl                |          | na                |         | na               |         | na               |          | 0.01               |
| P2O5                             | bdl                           |         | bdl                 |         | bdl                 |         | bdl                |          | na                |         | bdl              |         | na               |          | 30.7               |
| SO3                              | bdl                           |         | 0.08                | 0.10    | 0.07                | 0.03    | bdl                |          | na                |         | bdl              |         | na               |          | 0.18               |
| Total                            | 98.2                          | 0.7     | 86.2                | 3.9     | 78.1                | 3.3     | 86.8               | 1.6      | 99.1              | 0.6     | 99.6             | 1.0     | 101.3            | 0.7      | 92.3               |
| Mg#                              | 90.6                          |         | 88.2                |         | 89.4                |         | 88.6               |          |                   |         | 88.9             |         | 67.8             |          |                    |
| Wo                               |                               |         |                     |         |                     |         |                    |          |                   |         | 45.7             |         |                  |          |                    |
| <i>ions normalization method</i> | <b>13 cations<sup>†</sup></b> |         | <b>9 anions</b>     |         | <b>9 anions</b>     |         | <b>36 anions</b>   |          | <b>4 oxygen</b>   |         | <b>24 oxygen</b> |         | <b>24 oxygen</b> |          |                    |
| Si                               | 7.862                         |         | 1.920               | } 2.000 | 1.634               | } 1.800 | 6.760              | } 8.000  | 0.006             | } 1.990 | 7.968            | } 8.000 | 5.957            | } 5.960  |                    |
| Ti                               | 0.003                         |         | 0.080               |         | 0.161               |         | 1.240              |          | 0.013             |         | 0.032            |         |                  |          |                    |
| Al                               | 0.051                         |         | 0.083               |         | 1.193               | 0.001   | 0.013              |          |                   |         |                  |         |                  |          |                    |
| Al                               |                               |         |                     |         |                     |         |                    |          |                   |         |                  |         |                  |          |                    |
| Fe3+                             | 0.326                         |         |                     | } 2.800 | 0.012               | } 2.269 | 0.114              | } 11.710 | 1.948             | } 1.010 | 0.026            | } 8.020 | 0.003            | } 12.100 |                    |
| Cr                               |                               |         | 0.014               |         | 0.234               |         | 0.974              |          | 0.477             |         |                  |         |                  |          |                    |
| Fe2+                             | 0.149                         |         | 0.316               |         | 1.984               |         | 1.166              | 0.024    |                   | 3.816   |                  | 3.822   |                  |          |                    |
| Mg                               | 4.576                         |         | 2.352               |         | 1.984               |         | 9.104              | 0.024    |                   | 0.024   |                  | 0.024   |                  |          |                    |
| Mn                               | 0.021                         |         | 0.005               |         | 0.003               |         | 0.009              | 0.004    |                   | 0.004   |                  | 0.024   |                  |          |                    |
| Ca                               | 1.837                         |         | 0.004               |         | 0.007               |         | 0.041              | 0.006    |                   | 0.006   |                  | 3.615   |                  |          |                    |
| K                                |                               |         |                     |         |                     |         | 0.040              |          |                   |         |                  |         |                  |          |                    |
| Na                               | 0.212                         |         | 0.016               |         | 0.029               |         | 0.037              |          |                   |         | 0.040            |         |                  |          |                    |
| P                                |                               |         |                     |         |                     |         |                    |          |                   |         |                  |         |                  |          |                    |
| Ni                               |                               |         |                     |         |                     |         |                    |          |                   |         | 0.015            |         |                  |          |                    |
| OH***                            | 2.000                         |         | 4.409               |         | 6.458               |         | 16.600             |          |                   |         |                  |         |                  |          |                    |

\*Magnetite analyses re-calculated under the assumption that molar Fe<sup>2+</sup>/Fe<sup>3+</sup> = 2/3.

Detection limits: F - 0.04; Na2O - 0.02; K2O - 0.01; CaO - 0.01; SO3 - 0.03; Cl - 0.004; P2O5 - 0.03; TiO2 - 0.02; NiO 0.02.

bdl = below detection limit; na = not analyzed.

\*\*Small phosphate inclusion in magnetite. This analysis includes significant overlap with surrounding magnetite, therefore calculation of a cation mineral formula is not appropriate.

\*\*\* For serpentines and chlorite, cations calculated assuming wt.% H2O = 100-(analytical total from EMPA).

†Amphibole recalculated using method of Locock (2014). See Table S2 for complete calculation.

Supplementary Table 2. Compositions in wt.% of amphiboles from EMP analyses

|                                | Tremolite<br>(AHS 202) | Tremolite<br>(WAR-0979) | Ti-pargasite<br>(HS-177.4B) | Richterite<br>(ASU-03) | Magnesio-<br>hastingsite<br>(HS-115.4B) |
|--------------------------------|------------------------|-------------------------|-----------------------------|------------------------|-----------------------------------------|
| SiO <sub>2</sub>               | 57.50                  | 56.76                   | 41.63                       | 54.72                  | 44.97                                   |
| TiO <sub>2</sub>               | 0.03                   | 0.01                    | 2.89                        | 0.32                   | 0.29                                    |
| Al <sub>2</sub> O <sub>3</sub> | 0.32                   | 0.16                    | 13.58                       | 2.00                   | 11.17                                   |
| Cr <sub>2</sub> O <sub>3</sub> | 0.05                   |                         |                             |                        |                                         |
| MnO                            | 0.18                   | 0.12                    | 0.06                        | 0.11                   | 0.06                                    |
| FeO                            | 4.20                   | 3.63                    | 14.23                       | 2.32                   | 7.14                                    |
| NiO                            | 0.06                   |                         |                             |                        |                                         |
| MgO                            | 22.50                  | 21.98                   | 11.36                       | 22.55                  | 17.28                                   |
| CaO                            | 12.50                  | 12.86                   | 11.59                       | 9.21                   | 12.33                                   |
| Na <sub>2</sub> O              | 0.80                   | 0.39                    | 1.76                        | 4.15                   | 2.24                                    |
| K <sub>2</sub> O               | 0.00                   | 0.17                    | 1.61                        | 1.34                   | 0.83                                    |
| Total                          | 98.16                  | 96.08                   | 98.71                       | 96.72                  | 96.31                                   |

Non-AhS 202 amphibole analyses are from *Christensen et al.* [2000].

Supplementary Table 3. Amphibole formula assignments for the samples in Table S2 using the method of Locock (2014).

| Formula Assignments | Tremolite (AhS 202) | Tremolite (WAR-0979) | Ti-pargasite (HS-177.4B) | Richterite (ASU-03) | Magnesio-hastingsite (HS-115.4B) |
|---------------------|---------------------|----------------------|--------------------------|---------------------|----------------------------------|
| <b>T</b>            |                     |                      |                          |                     |                                  |
| Si                  | 7.862               | 7.946                | 6.102                    | 7.652               | 6.527                            |
| Al                  | 0.051               | 0.026                | 1.898                    | 0.330               | 1.473                            |
| Ti                  | 0.003               | 0.001                |                          | 0.019               |                                  |
| Fe <sup>3+</sup>    | 0.083               | 0.026                |                          |                     |                                  |
| T Total             | 7.999               | 7.999                | 8.000                    | 8.001               | 8.000                            |
| <b>C</b>            |                     |                      |                          |                     |                                  |
| Ti                  |                     |                      | 0.319                    | 0.015               | 0.032                            |
| Al                  |                     |                      | 0.447                    |                     | 0.438                            |
| Cr                  | 0.005               |                      |                          |                     |                                  |
| Mn <sup>3+</sup>    |                     |                      |                          |                     |                                  |
| Fe <sup>3+</sup>    | 0.243               | 0.059                | 0.372                    | 0.176               | 0.188                            |
| Ni                  | 0.007               |                      |                          |                     |                                  |
| Mn <sup>2+</sup>    | 0.021               | 0.014                | 0.007                    | 0.013               |                                  |
| Fe <sup>2+</sup>    | 0.149               | 0.340                | 1.372                    | 0.096               | 0.604                            |
| Mg                  | 4.576               | 4.587                | 2.482                    | 4.701               | 3.739                            |
| C Total             | 5.001               | 5.000                | 4.999                    | 5.001               | 5.001                            |
| <b>B</b>            |                     |                      |                          |                     |                                  |
| Mn <sup>2+</sup>    |                     |                      |                          |                     | 0.007                            |
| Fe <sup>2+</sup>    |                     |                      |                          |                     | 0.075                            |
| Mg                  |                     |                      |                          |                     |                                  |
| Ca                  | 1.837               | 1.929                | 1.820                    | 1.380               | 1.917                            |
| Na                  | 0.163               | 0.071                | 0.180                    | 0.620               |                                  |
| B Total             | 2.000               | 2.000                | 2.000                    | 2.000               | 1.999                            |
| <b>A</b>            |                     |                      |                          |                     |                                  |
| Ca                  |                     |                      |                          |                     |                                  |
| Na                  | 0.049               | 0.035                | 0.320                    | 0.505               | 0.630                            |
| K                   |                     | 0.030                | 0.301                    | 0.239               | 0.154                            |
| A subtotal          | 0.049               | 0.065                | 0.621                    | 0.744               | 0.784                            |
| <b>O (non-W)</b>    | 22.000              | 22.000               | 22.000                   | 22.000              | 22.000                           |
| <b>W</b>            |                     |                      |                          |                     |                                  |
| OH                  | 2.000               | 2.000                | 2.000                    | 2.000               | 2.000                            |
| F                   |                     |                      |                          |                     |                                  |
| Cl                  |                     |                      |                          |                     |                                  |
| O                   |                     |                      |                          |                     |                                  |
| W Total             | 2.000               | 2.000                | 2.000                    | 2.000               | 2.000                            |

\*All Fe calculated as Fe<sup>2+</sup> in EMP analyses.

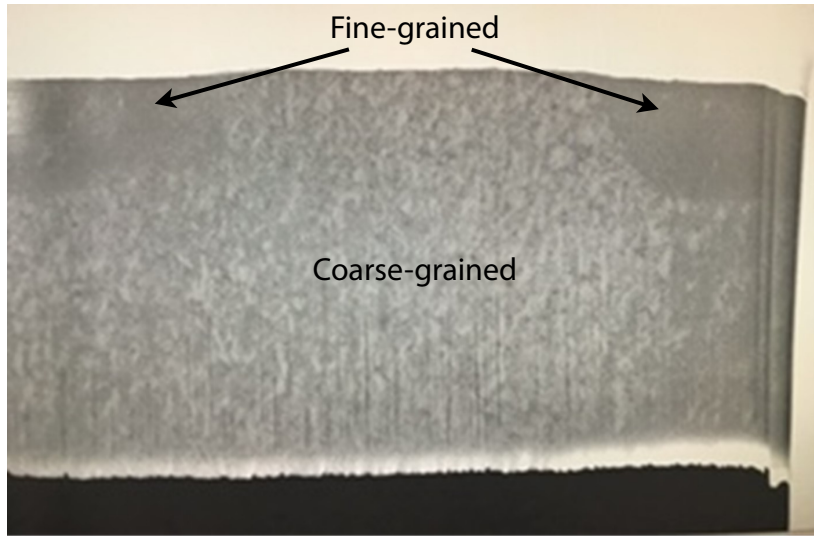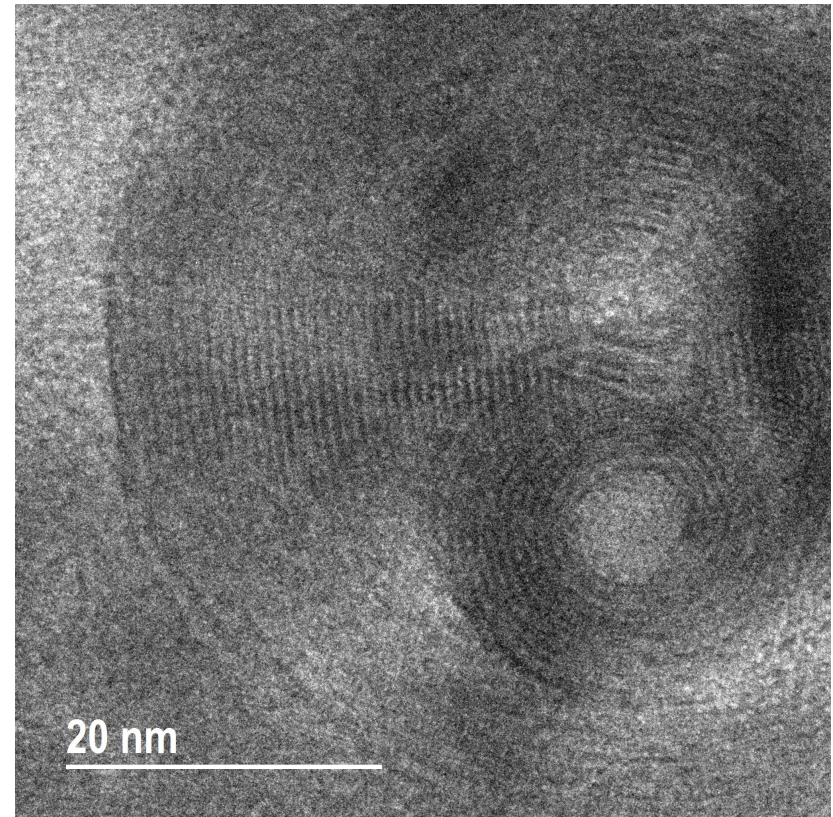

Supplementary Figure 1. (Left) Focused ion beam (FIB) slice from matrix serpentine in AhS 202 showing fine- and coarse-grained textures. FIB section is  $\sim 15 \mu\text{m}$  across. (Right) TEM image from coarse-grained region of FIB slice showing chrysotile structure with  $\sim 0.74 \text{ nm}$  lattice fringes.

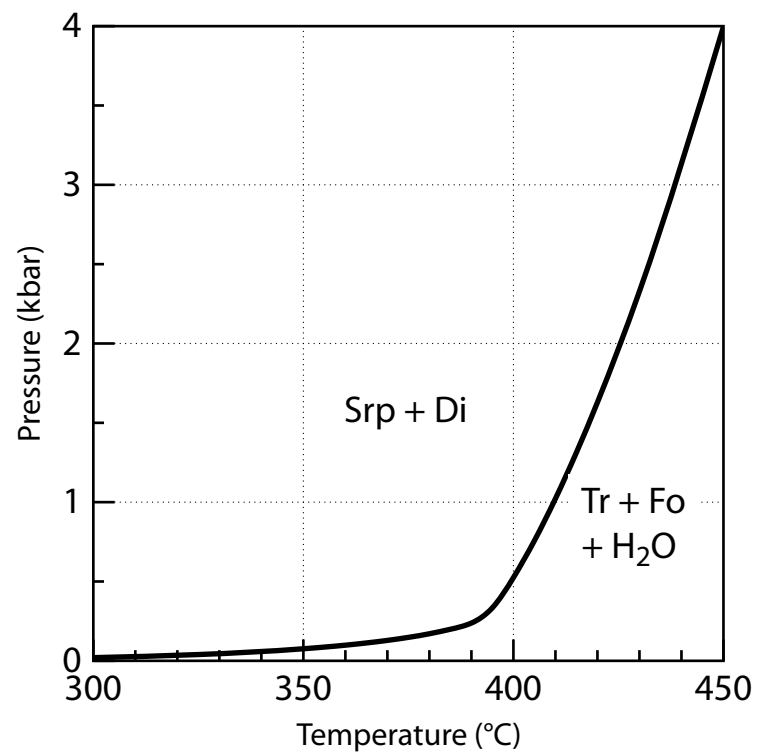

Supplementary Figure 2. Modeled pressure-temperature relations for the reaction serpentine + diopside = tremolite + olivine + H<sub>2</sub>O (see Methods) for the mineral compositions in AhS 202. Formation of tremolite is hindered by sluggish kinetics at temperatures below ~400-425° C, implying minimum pressures of 0.5-2.0 kbar.

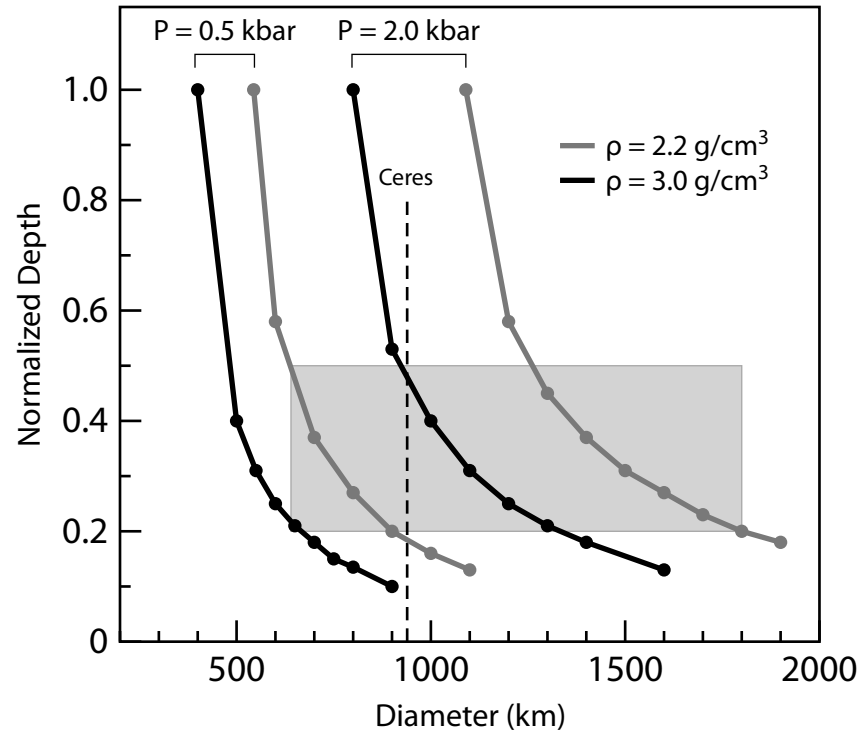

Supplementary Figure 3. Calculated parent body sizes as a function of material density for normalized depths to the target pressures shown (see Methods), where a normalized depth of 0.0 is at the surface and 1.0 is at the core. For the most reasonable depths (0.2 - 0.5) and material density ( $2.2 \text{ g/cm}^3$ ), AHS 202 parent body diameters range from 640 - 1800 km, encompassing the diameter of Ceres ( $\sim 940 \text{ km}$ ).
